1 A metabolic reconstruction of  
2 *Lactobacillus reuteri* JCM 1112 and  
3 analysis of its potential as a cell factory

4

5 Thordis Kristjansdottir(1,2,^), Elleke F. Bosma(3,^,#), Filipe Branco dos Santos(4), Emre Özdemir(3),  
6 Markus J. Herrgård(3), Lucas França(5), Bruno Sommer Ferreira(5), Alex T. Nielsen(3), Steinn  
7 Gudmundsson(1,\*)

8

9 (1) Center for Systems Biology, School of Engineering and Natural Sciences, University of Iceland,  
10 Dunhagi 5, 107 Reykjavik, Iceland

11 (2) Matis, Vinlandsleid 12, 113 Reykjavik, Iceland

12 (3) The Novo Nordisk Foundation Center for Biosustainability, Technical University of Denmark,  
13 Building 220, Kemitorvet, 2800 Kgs. Lyngby, Denmark

14 (4) Molecular Microbial Physiology Group of the Swammerdam Institute for Life Sciences, University  
15 of Amsterdam, Science Park 904, 1098 XH Amsterdam, The Netherlands

16 (5) Biotrend SA – Biocant Park, Núcleo 04, Lote 2, 3060-197 Cantanhede, Portugal

17 (#) Present address: Chr. Hansen A/S, Bøge Allé 10-12, 2970 Hørsholm, Denmark

18 (\*) Corresponding author, [steinng@hi.is](mailto:steinng@hi.is)

19 ^ These authors contributed equally to this work.

## 20 Abstract

### 21 Background

22 *Lactobacillus reuteri* is a heterofermentative Lactic Acid Bacterium (LAB) that is commonly used for  
23 food fermentations and probiotic purposes. Due to its robust properties, it is also increasingly  
24 considered for use as a cell factory. It produces several industrially important compounds such as  
25 1,3-propanediol and reuterin natively, but for cell factory purposes, developing improved strategies  
26 for engineering and fermentation optimization is crucial. Genome-scale metabolic models can be  
27 highly beneficial in guiding rational metabolic engineering. Reconstructing a reliable and a  
28 quantitatively accurate metabolic model requires extensive manual curation and incorporation of  
29 experimental data.

### 30 Results

31 A genome-scale metabolic model of *L. reuteri* JCM 1112<sup>T</sup> was reconstructed and the resulting model,  
32 Lreuteri\_530, was validated and tested with experimental data. Several knowledge gaps in the  
33 metabolism were identified and resolved during this process, including presence/absence of  
34 glycolytic genes. Flux distribution between the two glycolytic pathways, the phosphoketolase and  
35 Embden-Meyerhof-Parnas pathways, varies considerably between LAB species and strains. As these  
36 pathways result in different energy yields, it is important to include strain-specific utilization of these  
37 pathways in the model. We determined experimentally that the Embden-Meyerhof-Parnas pathway  
38 carried at most 7% of the total glycolytic flux. Predicted growth rates from Lreuteri\_530 were in good  
39 agreement with experimentally determined values. To further validate the prediction accuracy of  
40 Lreuteri\_530, the predicted effects of glycerol addition and *adhE* gene knock-out, which results in  
41 impaired ethanol production, were compared to *in vivo* data. Examination of both growth rates and  
42 uptake- and secretion rates of the main metabolites in central metabolism demonstrated that the  
43 model was able to accurately predict the experimentally observed effects. Lastly, the potential of *L.*  
44 *reuteri* as a cell factory was investigated, resulting in a number of general metabolic engineering  
45 strategies.

### 46 Conclusion

47 We have constructed a manually curated genome-scale metabolic model of *L. reuteri* JCM 1112<sup>T</sup> that  
48 has been experimentally parameterized and validated and can accurately predict metabolic behavior  
49 of this important platform cell factory.

## 50 1. Introduction

51 *Lactobacillus reuteri* is a heterofermentative Lactic Acid Bacterium (LAB) that is present in the human  
52 gut and is an important probiotic organism (Saulnier et al., 2011). There is an increasing interest in  
53 using it as a cell factory for the production of green chemicals and fuels in a biorefinery (Dishisha,  
54 Pereyra, Pyo, Britton, & Hatti-Kaul, 2014; Ricci et al., 2015), due to its robustness properties. It has  
55 high growth and glycolytic rates, without the requirement for either aeration or strictly anaerobic  
56 conditions. It is tolerant to low pH, ethanol and salt, and has a wide growth temperature range.  
57 Moreover, it is genetically accessible, enabling metabolic engineering for cell factory optimization  
58 (Bosma, Forster, & Nielsen, 2017). The species is known to produce 1,3-propanediol, reuterin, and  
59 other related industrially important compounds in high yields from glycerol (Dishisha et al., 2014), of  
60 which reuterin has also since long been known as antimicrobial (Talarico & Dobrogosz, 1989). *L.*  
61 *reuteri* also has most of the genes encoding for the enzymes needed for biosynthesis of 1,2-  
62 propanediol and 1-propanol, both of which are industrially relevant chemicals. These compounds  
63 are, however, not produced under normal conditions by *L. reuteri*, requiring improved engineering-  
64 and optimization strategies to achieve commercial level cell factories and production processes  
65 (International Publication Number WO 2014/102180 AI, 2014).

66 Genome-scale metabolic models are highly useful for directing metabolic engineering strategies, as  
67 well as to improve understanding of the physiology and metabolism of the target organism (Rau &  
68 Zeidan, 2018; Saulnier et al., 2011). So far, highly curated and experimentally validated metabolic  
69 models have been primarily developed for model organisms such as *Escherichia coli* and  
70 *Saccharomyces cerevisiae*, but models for several LAB species are also available, including  
71 *Lactobacillus plantarum* (Teusink et al., 2006), *Lactococcus lactis* (Oliveira, Nielsen, & Förster, 2005)  
72 and *Streptococcus thermophilus* (Pastink et al., 2009). These LAB are homofermentative or  
73 facultatively heterofermentative organisms and have significant differences in metabolism compared  
74 to strict heterofermenters such as *L. reuteri*. A metabolic model for the heterofermenter *Leuconostoc*  
75 *mesenteroides* (Koduru et al., 2017) is available, but as it is distantly related to *L. reuteri* it is of  
76 limited use here. Models for two probiotic strains of *L. reuteri* have been previously published  
77 (Saulnier et al., 2011). They were automatically reconstructed from the same draft model we started  
78 with here (Santos, 2008). The two previously published *L. reuteri* models were used along with  
79 transcriptomics data to identify qualitative metabolic differences between the two strains as well as  
80 to analyze their probiotic properties (Saulnier et al., 2011). However, these previous models were not  
81 manually curated and were not used to quantitatively predict metabolic behavior. The construction  
82 of a genome-scale metabolic model that can be reliably used in basic research and cell factory design

83 is a time-consuming process, requiring significant amount of manual curation and availability of  
84 strain-specific phenotypic data. At present, models obtained using automated tools or models that  
85 do not include experimental data are generally of limited use for quantitative predictions.

86 Here, we set out to reconstruct the metabolic network of *L. reuteri* JCM 1112, specifically for use in  
87 metabolic engineering applications, which requires collection of phenotypic data under several  
88 different conditions. We first performed an in-depth analysis of the genome to evaluate conflicting  
89 reports about metabolic pathways compared to strain DSM 20016. We then performed experiments  
90 to collect phenotypic data for the wild-type strain as well as for an alcohol dehydrogenase (*adhE*)  
91 knockout strain to constrain, validate, and test the model. The model as well as the experimental  
92 data are available in supplementary files.

## 93 2. Materials and methods

### 94 2.1 Strains, media and culture conditions

95 Strains used in this study are listed in Table 1 and an overview of the experimental datasets in Table  
96 2.

97 De Mann Rosa Sharp (MRS) medium (incl. 20 g/L glucose) was obtained from VWR and prepared  
98 according to the manufacturer's instructions.

99 Chemically Defined Medium (CDM) was used as described in (Santos, 2008) / (Teusink et al., 2005)  
100 with the following modifications: arginine 5 g/L, tween-80 1 mL/L. Substrates were 111 mM glucose  
101 and 20 mM glycerol as indicated. The CDM was filter-sterilized and the final pH after mixing all  
102 components was 5.6.

103 All flask cultivations were performed in a stationary incubator at 37°C. A 5 mm inoculation loop of  
104 culture was inoculated from -80°C glycerol stocks into 1 mL MRS with or without glycerol in a 1.5 mL  
105 Eppendorf tube and grown overnight (16h). Next morning, cultures were washed 3x with sterile 0.9%  
106 NaCl, after which OD<sub>600</sub> was measured and cells were transferred to 12 mL CDM with or without  
107 glycerol in a 15 mL Falcon tube to a starting OD<sub>600</sub> of 0.08. After 4h of growth, OD<sub>600</sub> was measured and  
108 cultures were transferred to a starting OD<sub>600</sub> of 0.05 in 100 mL pre-warmed CDM with or without  
109 glycerol in a 100 mL Schott flask. Samples for OD<sub>600</sub> measurement and HPLC were taken directly after  
110 inoculation (t=0h) and at 2, 3, 4, 5, and 6h; cultures were swirled for mixing prior to taking samples.  
111 The 6h samples were also used for protein and amino acid determinations. The time points used  
112 were all during exponential growth, ensuring a pseudo steady state (Additional file 1).

113 All bioreactor cultivations were performed in batch mode and samples were taken during  
114 exponential/pseudo-steady state (Additional file 1). One of the fermentations was performed in CDM  
115 at 37°C in 3.0 L bioreactors (BioFlo 115, New Brunswick Scientific/Eppendorf) with a 2.2 L working  
116 volume, 50 rpm agitation without gas sparging. The pH was controlled at 5.7±0.1 using 5N NaOH.  
117 Pre-cultures were performed similarly as for the flask cultures described above, with the pre-culture  
118 in CDM in 100 mL medium in 100 mL flasks, and reactors inoculated to an OD<sub>600</sub> of 0.1. The other two  
119 reactor cultivations were performed in CDM, with and without glycerol, at 37°C in 0.4 L reactors with  
120 a 0.5 L working volume, 50 rpm agitation and sparged with N<sub>2</sub> at 15 mL/min for 1h prior to  
121 inoculation. The pH was controlled at 5.8 using 5M NaOH. Fermenters were inoculated to an initial  
122 OD<sub>600</sub> of 0.05 from an exponentially growing culture on CDM without glycerol. As can be seen in  
123 Additional file 1, there is no difference between the cultures in the reactors that were sparged with

124 N2 prior to fermentations and those that were not and hence we decided to treat these as  
125 replicates.

126 The correlation factor between cell dry weight (gDW) and OD<sub>600</sub> was experimentally determined to be  
127 0.4007 gDW/OD<sub>600</sub> in CDM and used for calculating gDW from OD<sub>600</sub> in all experiments.

## 128 2.2 Analytical methods

129 Protein concentration of the cells was determined in the 6h samples as described above, via a BCA  
130 protein assay (Merck-Millipore cat. 71285) according to the manufacturer's protocol. Prior to the  
131 BCA assay, cell pellets were washed once in 0.9% NaCl and resuspended in 0.25 mM Tris-HCl pH 7.5  
132 and sonicated on ice with an Ultrasonic Homogenizer 300VT (BioLogics) for 3x 30s at 40% power,  
133 with 30s breaks on ice.

134 Amino acid composition of the cells was determined by Ansynth BV (The Netherlands) on washed cell  
135 pellets of a 6h CDM culture as described above.

136 Substrates, products and amino acids secreted and taken up during the cultivations were quantified  
137 using HPLC. Glucose, glycerol, ethanol, lactate, acetate, citrate, 1,2-propanediol, 1,3-propanediol, 1-  
138 propanol, 2-propanol, pyruvate, succinate and malate were quantified with either one of two HPLCs:  
139 1) a Dionex Ultimate 3000 (Thermo Scientific) containing an LPG-3400SD pump, a WPS-3000  
140 autosampler, a UV-visible (UV-Vis) DAD-3000 detector, and an RI-101 refraction index detector.  
141 Injection volume was 20 µL. An Aminex HPx87 ion exclusion 125-0140 column was used with a  
142 mobile phase of 5 mM H<sub>2</sub>SO<sub>4</sub>, a flow rate of 0.6 mL/min and an oven temperature of 60°C; 2) a  
143 Shimadzu LC-20AD equipped with refractive index and UV (210 nm) detectors, with an injection  
144 volume of 20 µL. A Shodex SH1011 8.0mmIDx300mm column was used with a mobile phase of 5 mM  
145 H<sub>2</sub>SO<sub>4</sub>, a flow rate of 0.6 mL/min and an oven temperature of 50°C. All amino acids, ornithine and  
146 GABA were quantified using a Dionex Ultimate 3000 (Thermo Scientific), for which the procedure is  
147 as follows: 20 µg/mL 2-aminobutanoic acid and sarcosine were used as internal standards for dilution  
148 of the samples; derivatization was performed in the autosampler. 0.5 µL sample was added into 2.5  
149 µL of (v/v) 3-mercaptopropionic acid in borate buffer (0.4 M, pH 10.2), mixed and incubated for 20 s  
150 at 4°C to reduce free cystines. Then 1 µL of 120 mM iodoacetic acid in 140 mM NaOH was added,  
151 mixed and incubated for 20 s at 4°C to alkylate reduced cysteines. 1.5 µL of OPA reagent (10 mg o-  
152 phthalaldehyde/mL in 3-mercaptopropionic acid) was then added to derivatize primary amino acids.  
153 The reaction was mixed and incubated for 20s at 4°C. 1 µL of FMOC reagent (2.5 mg 9-  
154 fluorenylmethyl chloroformate/mL in acetonitrile) was added, mixed and incubated for 20 s at 4°C to  
155 derivatize other amino acids. 50 µL of Buffer A (Buffer A: 40 mM Na<sub>2</sub>HPO<sub>4</sub>, 0.02% NaN<sub>3</sub> (w/v) at pH  
156 7.8) at pH 7 was added to lower the pH of the reaction prior to injecting the 56.5 µL reaction onto a

157 Gemini C18 column (3  $\mu$ m, 4.6 x 150 mm, Phenomenex PN: 00F-4439-E0) with a guard column  
158 (SecurityGuard Gemini C18, Phenomenex PN: AJO-7597). The column temperature was kept at 37°C  
159 in a thermostatic column compartment. The mobile phase had the following composition: Buffer A:  
160 see above, pH 7.8; Buffer B: 45% (v/v) acetonitrile, 45% (v/v) methanol and 10% (v/v) water; flow  
161 rate 1 mL/min. Derivatized amino acids were monitored using a fluorescence detector. OPA-  
162 derivatized amino acids were detected at 340<sub>ex</sub> and 450<sub>em</sub> nm and FMOC-derivatized amino acids at  
163 266<sub>ex</sub> and 305<sub>em</sub> nm. Quantifications were based on standard curves derived from dilutions of a mixed  
164 amino acid standard (250  $\mu$ g/mL). The upper and lower limits of quantification were 100 and 0.5  
165  $\mu$ g/mL, respectively.

## 166 2.3 Genome sequencing and analysis

167 For genomic DNA (gDNA) isolation, overnight cultures of DSM 20016 and SJ 11774 were grown in  
168 MRS and the pellet was used for gDNA isolation using the Epicentre MasterPure™ Gram Positive DNA  
169 Purification kit according to the manufacturer's protocol. Subsequent genome sequencing was  
170 performed at the sequencing facility at the NNF Center for Biosustainability. Library preparation was  
171 performed using KAPA HyperPlus Library Prep Kit (ROCHE) with Illumina-compatible dual-indexed  
172 PentAdapters (PentaBase). The average size of the library pool was 317 bp. Sequencing was  
173 performed on MiSeq (Illumina) using the MiSeq Reagent Kit v2, 300 Cycles (Illumina). The libraries  
174 were loaded to the flow cell at 10 pM and sequenced using paired-end reads of 150 bp. Read quality  
175 check was performed with FastQC version 0.11.5. Mutations relative to reference (*L. reuteri* JCM  
176 1112, GenBank accession nr AP007281, annotated with Prokka version 1.11) were identified using  
177 Breseq (version 0.31.0) (Deatherage & Barrick, 2014). Mean coverage was 143.7x (SJ 11774) and  
178 129.5x (DSM 20016). All runs were performed at Danish national supercomputer for life sciences  
179 (Computerome), Technical University of Denmark. For this work, the annotated genome of *L. reuteri*  
180 JCM 1112 from NCBI was used. During the reconstruction, several genes were re-annotated, based  
181 on BLAST and physiological data. A list of all genes in the JCM 1112 genome can be found in  
182 Additional file 2, along with annotations from the GenBank file and which model reactions are  
183 associated with each gene.

## 184 2.4 Metabolic reconstruction

185 The *L. reuteri* JCM 1112 metabolic reconstruction was based on an unpublished, automatically  
186 generated draft reconstruction of JCM 1112 (Santos, 2008). We performed extensive manual  
187 curation, including: gap filling, updating and adding gene-protein-reaction (GPR) associations,  
188 updating gene IDs, updating metabolite- and reaction abbreviations, in line with the BiGG database

189 (King et al., 2016), updating and adding missing formulas and/or charges to metabolites, fixing  
190 unbalanced reactions, adding annotation to metabolites, reactions and genes and detailed review  
191 and integration of organism specific data. A biomass objective function was formulated based on  
192 available data on *L. reuteri* and related strains. The ATP cost of growth-associated maintenance  
193 (GAM) was estimated using one of the data sets (Table 2) by adjusting the GAM parameter so that  
194 growth predictions matched *in vivo* growth. This data set was then excluded from subsequent  
195 validation and prediction steps.

## 196 2.5 Flux balance analysis

197 Flux balance analysis (FBA) was used to analyze the genome-scale metabolic model (Fell & Small,  
198 1986; Savinell & Palsson, 1992) by constraining exchange reactions in the model with experimental  
199 values of substrate uptake and secretion rates. To take into account that the Embden–Meyerhof–  
200 Parnas (EMPP) pathway is a minor glycolytic pathway in *L. reuteri* compared to the phosphoketolase  
201 pathway (PKP) (section 3.1.1), an additional flux constraint was added to the model

202

$$\frac{v_{PFK}}{v_{PFK} + v_{G6PDH2r}} \leq r,$$

203

204 where  $r$  is an empirically determined flux ratio,  $v_{PFK}$  denotes flux in the rate limiting step of the EMPP  
205 and  $v_{G6PDH2r}$  is the flux in the first reaction branching into the PKP.

206 We used a variant of FBA called parsimonious FBA (Lewis et al., 2010) which identifies flux values  
207 corresponding to maximum growth with the side constraint that the sum of absolute flux values is  
208 made as small as possible. The sum of fluxes is proxy for enzyme usage and the method can  
209 therefore be considered to simulate biological pressure for rapid and efficient growth using minimum  
210 amount of resources (enzymes). An advantage over FBA is that the resulting solution is likely to  
211 contain fewer infeasible flux cycles. Model simulations were carried out in Python with the CobraPy  
212 toolbox (Ebrahim, Lerman, Palsson, & Hyduke, 2013) and GLPK solver. All code used in the  
213 simulations is provided in the form of a Jupyter notebook in Additional file 3 and on  
214 <https://github.com/steinng/reuteri>. The Escher package (King et al., 2015) was used for visualization  
215 of flux predictions. Escher maps of *L. reuteri*'s central metabolism are provided in Additional file 4,  
216 both simplified maps as shown in sections 3.2.2 and 3.2.3 as well as a detailed map linking different  
217 sugar utilization pathways to the central metabolism.



218 To predict growth rates the model was constrained with uptake rates of glucose, glycerol and five  
219 amino acids (Arg, Ser, Asn, Asp and Glu), and with the secretion rates of ethanol, lactate, acetate and  
220 1,3-propanediol. Effects of knocking out the *adhE* gene were predicted by temporarily deleting it  
221 from the network. Where the effects of an active 1,2-propanediol pathway were predicted, a  
222 methylglyoxal synthase (MGS) was added to the model and optimized for growth.

223 To predict the theoretical maximum yields of selected target compounds, a reaction enabling the  
224 secretion of the corresponding metabolite was added to the model, unless an exchange reaction  
225 already existed, and flux through the reaction maximized. The glucose uptake rate was 25.2 mmol  
226  $\text{gDW}^{-1} \text{h}^{-1}$ , based on experimental data, and free secretion of by-products was allowed. For the  
227 production of L-alanine, an L-alanine dehydrogenase was added to the model. The production of  
228 ethyl lactate required the addition of a lactate acyl transferase and a reaction for the condensation of  
229 lactoyl-CoA with ethanol (Lee & Trinh, 2018). To produce 1-propanol, a methylglyoxal synthase  
230 (MGS) was added to the model. The presence of a complete 1-propanol pathway enables more  
231 efficient regeneration of NAD and the flux predictions were therefore repeated in the presence of an  
232 active MGS. To simulate a non-limiting phosphofructokinase, the flux constraint involving  $v_{\text{PFK}}$  above  
233 was omitted.

234

## 235 3. Results and discussion

### 236 3.1 Metabolic network reconstruction

237 To reconstruct a genome-scale metabolic model of *L. reuteri* suitable for use in cell factory design  
238 and optimization, we built upon a draft metabolic model of *L. reuteri* JCM 1112 described in (Santos,  
239 2008) that we in turn extensively curated. The Memote tool (Lieven et al., 2018) was used to assess  
240 the quality of the reconstruction and to guide the curation process (Additional file 5). The main  
241 characteristics of the resulting Lreuteri\_530 model (Additional file 6) are listed in Table 3.

#### 242 3.1.1 Curation process

243 Reactions and metabolites were abbreviated according to the BiGG database nomenclature where  
244 applicable and annotations with links to external databases included. Genes from the JCM 1112  
245 genome were identified with locus tags from the GenBank file, and annotations were included which  
246 contain: the old locus tag which is often found in older literature, the NCBI protein ID, gene  
247 annotation and the protein sequence. Apart from general network curation, organism-specific  
248 information obtained from laboratory experiments and from available literature was integrated by  
249 reviewing reactions, genes and gene-protein-reaction (GPR) rules.

#### 250 **Resequencing reveals inconsistencies between the “same” strains *L. reuteri* DSM 20016 and JCM** 251 **1112 - implications for glycolytic genes**

252 The two most well-known strain names and origins for the type strain are DSM 20016 and JCM 1112  
253 from the DSMZ and JCM culture collections, respectively. These two are derived from the same  
254 original human faeces isolate *L. reuteri* F275 (Kandler, Stetter, & Köhl, 1980), which was grown and  
255 stocked in two different laboratories (Frese et al., 2011). Both genomes have been sequenced  
256 previously and a comparison showed two remarkable differences between these two strains derived  
257 from the same parent strain: DSM 20016 was missing two large regions (Morita et al., 2008), most  
258 likely lost during the 20 years of separate laboratory cultivation (Frese et al., 2011). The first region  
259 (8,435 bp, flanked by IS4 insertion sequences on each end) contains genes for glycolysis, namely  
260 glyceraldehyde-3-P dehydrogenase, phosphoglycerate kinase, triosephosphate isomerase, and  
261 enolase. The second region (30,237 bp, flanked by two different insertion sequence elements)  
262 contains a gene cluster for nitrate reductases and molybdopterin biosynthesis (Morita et al., 2008).  
263 As the first island consists of glycolytic genes, the implications of its presence or absence are  
264 profound. This island is absent in DSM 20016, but we could identify homologs of all this island's

265 genes except glyceraldehyde-3-P dehydrogenase elsewhere in its genome based on annotation  
266 and/or BLAST.

267 During the preparation of our model, it became clear that there are inconsistencies in naming and  
268 hence gene content of the *L. reuteri* type strain. We sequenced the DSM 20016 strain that we  
269 obtained from DSMZ and this showed that its genome is identical to that of JCM 1112 instead. A  
270 similar result of these strains being 'swapped' was obtained by others based on whole genome  
271 sequencing (US 2015O125959A1, 2015) and PCR of part of the largest missing region in DSM 20016  
272 (Etzold et al., 2014). This inconsistency between the two strains does not seem to be commonly  
273 known and taken into account, and we suspect that some papers referring to either the DSM or the  
274 JCM strain might in fact be working with the other strain. For example, the DSM 20016 strain used by  
275 Sun et al., sequenced in 2015 (accession nr AZDD00000000), contains the islands and hence is  
276 actually the JCM 1112 strain (Sun et al., 2015), whereas the DSM 20016<sup>T</sup> referred to by Morita et al.,  
277 sequenced in 2007 by JGI (accession nr CP000705), was shown to be DSM 20016, missing the islands  
278 (Morita et al., 2008). Both strains were obtained from DSMZ. This highlights the importance of re-  
279 sequencing of strains ordered from culture collections or lab strains present in the laboratory before  
280 using them for engineering or characterization studies. We strongly suggest that studies working with  
281 any *L. reuteri* type strain perform PCR on the two islands or perform resequencing as the presence of  
282 the first island determines whether the strain contains a full glycolytic pathway or not. In our model,  
283 we have included all genes in the islands based on the sequencing results. The reconstruction was  
284 based on the genomic information of the JCM 1112 strain, obtained from NCBI, and the genes in the  
285 model are identified with the locus tags obtained from there. As many other publications refer to  
286 genes in the DSM 20016 strain or use the old locus tags from the JCM 1112 genome, we have  
287 included a table (Additional file 2) which lists: the locus tags used in the model (LAR\_RSXXXXX), the  
288 old locus tags (LAR\_XXXX), the annotations obtained from the NCBI GenBank file, the NCBI protein  
289 IDs (WP numbers), the locus tags of the corresponding genes in the DSM 20016 strain, when  
290 applicable (Lreu\_XXXX), and finally the reaction(s) in the metabolic model associated with the genes.

### 291 **Phosphofructokinase (PFK) and the distribution between EMP and PK pathway usage**

292 Obligately heterofermentative lactobacilli like *L. reuteri* are often considered to solely use the  
293 phosphoketolase pathway (PKP) instead of the Embden-Meyerhof-Parnas pathway (EMPP) for  
294 glucose consumption (Bosma et al., 2017) (Figure 1). Both pathways result in the glycolytic  
295 intermediate glyceraldehyde-3-phosphate but use different redox cofactors (Figure 1). As the PKP  
296 yields one and the EMPP two molecules of glyceraldehyde-3-phosphate, the PKP has a lower energy  
297 yield than the EMPP (Figure 1). The PKP generally results in the production of one molecule of lactate  
298 and one molecule of ethanol or acetate for one glucose molecule while the EMPP generally yields

299 two lactate molecules. Key enzymes of the EMPP are fructokinase (FK), glucose-6-phosphate  
300 isomerase (PGI), phosphofructokinase (PFK), fructose-bis-phosphate aldolase (FBA), and  
301 triosephosphate isomerase (TPI). In line with the idea that heterofermenters use the PKP, Sun et al.  
302 showed in a comparison of 213 LAB genomes that *pfk* was lacking from a distinct monophyletic group  
303 formed by mainly (87%) obligatively and otherwise facultatively heterofermentative *Lactobacillus*  
304 spp., including *L. reuteri* DSM 20016 and *L. panis* DSM 6035 (Sun et al., 2015). Contrary to most other  
305 species in the same group, these two species did contain *fba*, which has traditionally been linked to  
306 the presence of the EMPP. Despite the absence of *pfk*, EMPP activity has been observed in several *L.*  
307 *reuteri* strains and in some strains it appears to play a major role compared to the PKP, depending on  
308 the growth phase, and showing strain-specific differences (Årsköld et al., 2008; Burgé et al., 2015).  
309 For modeling and engineering purposes, it is crucial to understand the presence and activity of the  
310 PKP vs the EMPP.

311 Årsköld et al. (2008) compared the genomic organization of 13 sequenced *Lactobacillales* and  
312 showed that *L. reuteri* (strains ATCC 55730 and DSM 20016) is one of the four exceptions that do not  
313 have a *pfkA* gene where this is located in all other species. Nevertheless, they detect PFK and EMPP  
314 activity in strain ATCC 55730 and subsequently identify two genes (GenBank accession nrs EF547651  
315 and EF547653) for orthologues of *pfkB*, a minor PFK-variant in *E. coli* (Årsköld et al., 2008). In analogy  
316 with Årsköld et al. in *L. reuteri*, Kang et al. (Kang, Korber, & Tanaka, 2013) identified a ribokinase in  
317 the obligately heterofermentative *L. panis* PM1 with 82% similarity to the *pfkB* gene identified in *L.*  
318 *reuteri* ATCC 55730 from Årsköld et al. (74% in our own BLAST search).

319 A BLAST comparison of the *pfkB* protein sequence of *L. panis* PM1 (GenBank accession nr  
320 AGU90228.1) and *L. reuteri* ATCC 55730 (GenBank accession nr ABQ23677.1) against *L. reuteri* JCM  
321 1112 resulted in 81% and 99% identity, respectively, to JCM 1112 gene number LAR\_RS02150, which  
322 is annotated as ribokinase rbsK\_2. On a gene level, this gene shares 97% identity with *L. reuteri* ATCC  
323 55730 and 73% with *L. panis* PM1. The same identities were found in *L. reuteri* DSM 20016 for gene  
324 LREU\_RS02105 (previously Lreu\_0404, GenBank protein KRK49592.1). A second gene annotated as  
325 “ribokinase rbsK\_3” (locus tag LAR\_RS06895) showed only limited query coverage and identity and  
326 hence rbsK\_2 is the most likely homolog of *pfkB*. The growth experiments conducted in the present  
327 study with JCM 1112 are in line with the findings of Burgé et al. and indicate minor though detectable  
328 usage of the EMPP in this strain with a peak in the early growth stage (Figure 2), in which this rbsK\_2  
329 likely fulfills the role of *pfkB*. The average flux through the EMPP in all cultures was 7.0% (Figure 2)  
330 and was used to define the corresponding flux split ratio in the model (section 2.5).

### 331 **Sugar transport**

332 Transport of carbohydrates can be mediated by ATP-Binding Cassette (ABC) transporters,  
333 phosphotransferase systems (PTS), or secondary transporters (permeases of the Major Facilitator  
334 Superfamily, MFS) (Saier, 2000). PTS systems mediate hexose mono- or dimer transport and  
335 phosphorylation simultaneously – mostly by using PEP to pyruvate conversion as phosphate donor,  
336 whereas ABC-transporters (mostly used for pentoses) and permeases (both pentoses and hexoses)  
337 perform only transport, and a separate ATP-utilizing kinase step is needed for sugar phosphorylation.  
338 Moreover, in Gram positives, PTS systems have an important role in carbon catabolite repression via  
339 phosphorylation cascades and direct interaction with the carbon catabolite repression protein A  
340 (ccpA) (Galinier & Deutscher, 2017; Görke & Stülke, 2008). Heterofermentative LAB contain fewer  
341 PTS system components than homofermentative LAB, which is thought to be the result of gene loss  
342 (Zheng, Ruan, Sun, & Gänzle, 2015). In general, organisms using the EMPP are believed to use PTS  
343 systems, and organism using the PKP to use secondary carriers (Romano, Trifone, & Brustolon, 1979).  
344 Likely as a result of the lack of full PTS systems, glucose utilization is not constitutive but substrate-  
345 induced in heterofermenters, and utilization of several other sugars is not repressed by glucose  
346 (Galinier & Deutscher, 2017). Sugar transport in heterofermenters is poorly characterized, and only  
347 recently a study was dedicated to the genomic and phenotypic characterization of carbohydrate  
348 transport and metabolism in *L. reuteri*, as representative of heterofermentative LAB (Zhao & Gänzle,  
349 2018). This showed that *L. reuteri* completely lacks PTS systems and ABC-transporters and solely  
350 relies on secondary transporters of the MFS superfamily, which use the proton motive force (PMF) as  
351 energy source for transport (Zhao & Gänzle, 2018). In *L. reuteri* JCM 1112, we could identify the two  
352 common proteins of the PTS system, Enzyme I (Lreu\_1324) and HPr (Lreu\_1325). Some sugar-specific  
353 parts were present, but no complete PTS was identified. As a result, all sugar transport in the model  
354 takes place via the PMF.

### 355 **Glycerol utilization**

356 *L. reuteri*, like many lactobacilli, is known to be unable to grow on glycerol as a sole carbon source,  
357 but can use it as an alternative electron acceptor, providing a means to gain energy on a variety of  
358 carbon sources (Sriramulu et al., 2008; Talarico, Axelsson, Novotny, Fiuzat, & Dobrogosz, 1990). *L.*  
359 *reuteri* is the only known lactobacillus producing large amounts of 3-hydroxypropionaldehyde  
360 (reuterin, 3-HPA) from glycerol. This is an intermediate in the pathway to 1,3-propanediol (1,3-PDO,  
361 also produced by *L. reuteri*, depending on the conditions used) that is known to be toxic and  
362 produced in a microcompartment (Chen, Bromberger, Nieuwenhuijs, & Hatti-Kaul, 2016). The reason  
363 why it cannot grow on glycerol as sole carbon source is currently not fully clear, although it is likely  
364 related to gene regulation. All the genes that are necessary to convert glycerol to dihydroxyacetone

365 phosphate via either dihydroxyacetone (DHA) or glycerol-3-phosphate and hence shuttle it into  
366 glycolysis are present in the *L. reuteri* genome (Chen et al., 2016). However, several of these genes  
367 have been shown to be downregulated in the presence of glycerol (Chen et al., 2016; Santos et al.,  
368 2008). Furthermore, the *L. reuteri* glycerol dehydrogenase also has activity as 1,3-PDO:NAD-  
369 oxidoreductase, whereas in for example *Klebsiella pneumoniae*, which does produce glycolytic end  
370 products from glycerol, these are two different enzymes (Talarico et al., 1990). It seems that the  
371 physiological role of this enzyme in *L. reuteri* is the reduction of 3-HPA to 1,3-PDO, rather than  
372 glycerol to DHA conversion, explaining the lack of growth on glycerol (Talarico et al., 1990).

### 373 **Other pathways**

374 Most heterofermentative LAB possess a malolactic enzyme but no malic enzymes (Landete, Ferrer,  
375 Monedero, & Zúñiga, 2013), which is also the case for our *L. reuteri* strain, based on sequence  
376 comparisons with the *L. casei* strain used by Landete et al. (Landete et al., 2013). Based on BLAST  
377 analysis and in line with literature, *L. reuteri* JCM 1112 possesses a malate dehydrogenase and PEP  
378 carboxykinase, and cannot utilize citrate; malate (and fumarate) is converted to succinate (Gänzle,  
379 Vermeulen, & Vogel, 2007).

380 From a biotechnological perspective, an interesting branch point of central carbon metabolism is the  
381 conversion from methylglyoxal (MG) to 1,2-propanediol (1,2-PDO), which can then be further  
382 metabolized into 1-propanol and propanoate. *L. reuteri* possesses all enzymes needed for these  
383 pathways, except methylglyoxal synthase (MGS), the step of the pathway, converting  
384 dihydroxyacetone phosphate into MG (Gandhi, Cobra, Steele, Markley, & Rankin, 2018; Sriramulu et  
385 al., 2008). It has been shown that when MG is added to *L. reuteri* JCM 1112 cultures or when a  
386 heterologous *mgs* is expressed, all the subsequent metabolites are formed (International Publication  
387 Number WO 2014/102180 AI, 2014). Although we identified a potential distant homolog of *mgs* in  
388 the *L. reuteri* genome, this homolog is clearly not active under normal conditions since no 1,2-PDO  
389 was observed in our experiments. Hence, all the genes in these pathways except *mgs* were included  
390 in the reconstruction. For methylglyoxal reductase, *mgr*, we also identified several aldo/keto  
391 reductases as possible homologs, based BLAST comparison to genes identified in (Gandhi et al.,  
392 2018). However, verification of these hypothetical activities would need extensive enzyme assays,  
393 and it is also likely that this reaction is performed by LAR\_RS09730 (Glycerol dehydrogenase) (Altaras  
394 & Cameron, 1999; Yamada & Tani, 2011), this has been added to the reconstruction for the MGR  
395 reaction. Alternatively, MG might be converted directly to lactate by a glyoxalase (Gandhi et al.,  
396 2018).

397 *L. reuteri* can produce vitamin B12, and the structure and biosynthetic genes have been studied  
398 (Santos et al., 2007, 2008). The corresponding pathway is present in the reconstruction and is active  
399 during growth predictions.

### 400 3.1.2 Biomass reaction and energy requirements

401 A biomass objective function (BOF), which contains all necessary components for biomass  
402 biosynthesis, is commonly used to predict growth rate in metabolic models. Ideally, the BOF should  
403 be constructed based on organism-specific experimental data, mainly the fractional composition of  
404 the macromolecules (proteins, DNA, RNA, lipids, etc.) and their individual building blocks (amino  
405 acids, nucleotides, fatty acids, etc.), as well as the energy necessary for their biosynthesis (Feist &  
406 Palsson, 2010). The protein fraction is a significant fraction of the biomass and was therefore  
407 measured. The remaining macromolecular fractions were derived from *L. plantarum* (Teusink et al.,  
408 2006) and *L. lactis* (Oliveira et al., 2005). The ratio of amino acids in the *L. reuteri* biomass was also  
409 measured. Nucleotide composition was estimated from the genome, which in the case of RNA is not  
410 ideal since it assumes equal transcription of all genes. We however preferred to use this  
411 approximation instead of using experimental data from another organism. Fatty acid composition of  
412 *L. reuteri* was obtained from literature (Liu, Hou, Zhang, Zeng, & Qiao, 2014), while phospholipid  
413 composition was adopted from *L. plantarum*. The composition of lipoteichoic acid (Walter et al.,  
414 2007) and exopolysaccharides (Ksonzeková et al., 2016) in *L. reuteri* were obtained from literature.  
415 Peptidoglycan composition was adopted from *L. plantarum* and glycogen was assumed to be  
416 negligible (Dauner & Sauer, 2001; Dauner, Storni, & Sauer, 2001).

417 Energy required for growth- (GAM) and cell maintenance (NGAM) are important parameters in  
418 metabolic models, and can be estimated from ATP production rates, which can be calculated from  
419 experimental data obtained at different dilution rates (Tempest & Neijssel, 1984). Unfortunately, this  
420 data is not publicly available for *L. reuteri*. These parameters have been estimated from experimental  
421 data for several other LAB, including *L. plantarum*, and reported in literature (Teusink et al., 2006).  
422 Even though *L. reuteri* and *L. plantarum* are relatively closely related, adopting these parameters  
423 from *L. plantarum* can negatively affect the quality of model predictions. When the differences in  
424 physiologies of *L. plantarum* and *L. reuteri* are considered, it is possible that *L. reuteri* requires less  
425 energy: (1) The genome is only ~2 Mb, while *L. plantarum*'s genome is 3.3 Mb. (2) *L. reuteri* is an  
426 obligate heterofermenter, which means it uses almost solely the PKP (Fig. 2) to break down glucose,  
427 resulting in one ATP per glucose, while a facultative heterofermenter like *L. plantarum* uses the  
428 EMPP when grown on glucose, resulting in two ATPs. (3) LAB in general have low catabolic  
429 capabilities, and for *L. reuteri* this includes auxotrophy for several amino acids. This, combined with

430 the fact that macromolecular biosynthesis is already accounted for in the model reactions, supports  
431 the claim that adopting energy parameters from *L. plantarum* can negatively affect model  
432 predictions, as we also observed when evaluating this in our model. We decided to use one of our  
433 experimental datasets (Table 2) to estimate the GAM value, while using the NGAM value from *L.*  
434 *plantarum* (section 2.4). In general, NGAM represents only a small portion of the total energy  
435 requirements of the cell and therefore has much smaller effect on model predictions than GAM. This  
436 resulted in a GAM value of 10.2 mmol gDW<sup>-1</sup> h<sup>-1</sup>. Detailed description of the biomass reaction,  
437 relevant data and calculations can be found in Additional file 7.

## 438 3.2 Model applications

### 439 3.2.1 Model validation using experimental data: Growth rate comparisons

440 To validate the model, several different datasets (Table 2) with measured uptake- and secretion rates  
441 of carbon sources, amino acids and organic byproducts were used to constrain exchange fluxes in the  
442 model. The predicted growth rates were compared with observed experimental growth rates (Figure  
443 3). In all cases, flux through the EMPP was set to maximally 7% based on the experimentally  
444 determined value (Figure 1). The chemically defined culture medium used in the growth experiments  
445 contained all 20 amino acids, except for L-glutamine. Subsequently, all these amino acids were  
446 quantified during growth and the model was constrained with the resulting uptake rates. Of all the  
447 amino acids, only arginine was depleted at the end of the exponential phases in data sets A, B and C  
448 (Additional file 1). Due to auxotrophy for several amino acids (Glu, His, Thr, Arg, Tyr, Val, Met, Try,  
449 Phe, Leu), the model is highly sensitive to uncertainties in measurements, as well as in determined  
450 protein- and amino acid fractions of the biomass reaction. To accurately represent amino acids in the  
451 biomass reaction, both the protein content and the amino acid ratio were measured (Additional file  
452 7). By enabling unrestricted uptake of amino acids in the model, we noticed that only 5 amino acids  
453 (Arg, Ser, Asn, Asp, Glu) needed to be constrained with measured uptake rates for accurate growth  
454 predictions, for both the wild-type and the mutant. This is due to their role in energy- and cofactor  
455 metabolism, not only in biomass biosynthesis. Hence, only this minimum number of amino acids was  
456 used to constrain the model in the following. The remainder were assumed to be non-limiting by  
457 allowing unrestricted uptake. This has twofold advantage. First, it limits the effects of uncertainties in  
458 amino acid uptake rate measurements on model predictions, a problem exacerbated by the amino  
459 acid auxotrophy. Second, it simplifies future applications of the model by reducing the number of  
460 measurements needed.



461 In most cases, model predictions and *in vivo* data were in good agreement (Figure 3). Datasets C and  
462 D in Figure 3 show a variant of the WT strain (marked SJ (WT\*)), which lacks two restriction  
463 modification (RM) systems for easier genetic manipulation (Table 1). Datasets E and F show a mutant  
464 derived of the SJ strain with a clean and in-frame deletion of the *adhE* gene (bifunctional  
465 aldehyde/alcohol dehydrogenase). The model predicts slightly higher growth rates than observed *in*  
466 *vivo* for the SJ strain (datasets C and D in Figure 3) and the mutant strain grown on glucose and  
467 glycerol (F in Figure 3). Unexpectedly, the RM-modifications in the SJ strain seem to slightly alter its  
468 behavior on CDM with glucose and glycerol compared to the WT (Additional file 1). For the mutant  
469 strain grown on glucose (dataset E in Figure 3), the model predicts a slightly lower growth rate than  
470 observed *in vivo*, though both show a large decrease in growth, compared to the WT. The most likely  
471 explanation for this is that some glucose is being taken up *in vivo*, even though the measurements  
472 did not show this (the likely amount consumed between two samples is within the error of the  
473 assay). Secretion of 2.6 mmol gDW<sup>-1</sup> h<sup>-1</sup> of lactate and 2.7 mmol gDW<sup>-1</sup> h<sup>-1</sup> of acetate was observed *in*  
474 *vivo*. The model, however, does not predict lactate and acetate secretion unless some glucose uptake  
475 is allowed. If a glucose uptake of 2.6 mmol gDW<sup>-1</sup> h<sup>-1</sup> is allowed, the growth rate increases from 0.22  
476 to 0.34 h<sup>-1</sup>, compared to 0.30 h<sup>-1</sup> *in vivo*. Amino acid measurements showed that the mutant in  
477 dataset E used L-arginine to a greater extent than the WT, which the model predicts is used to  
478 generate energy via the arginine deiminase pathway, resulting in increased growth.

### 479 3.2.2 Effects of adding glycerol and deleting *adhE*

480 To investigate the applicability of the model for cell factory design, it was used to predict the effects  
481 of adding glycerol to the glucose-based culture medium, as well as knocking out the *adhE* gene,  
482 which plays a critical role in ethanol production and redox balance (Figure 1). The datasets used here  
483 are the same as in section 3.2.1 (datasets C - F in Figure 3). There, the aim was to validate the model  
484 by means of comparing predicted growth rates to experimentally determined growth rates. In this  
485 section, we look more specifically at predicted flux distributions in central metabolism, both with and  
486 without strain- and condition-specific experimentally determined constraints. For this purpose, we  
487 studied two cases in order to answer the following questions: (1) If the model is constrained only  
488 with experimentally determined glucose- and five amino acid uptake rates from the WT strain grown  
489 on glucose, how do the predicted effects of glycerol addition and/or *adhE* knock-out (dark green bars  
490 in figure 4) compare to *in vivo* growth rate and uptake- and secretion measurements (light orange  
491 bars in figure 4)? This was tested to evaluate the applicability of the model in a practical setting. One  
492 of the main goals of using a model like this should be to probe the effects of genetic and media  
493 perturbations *in silico*, *i.e.* without having to do extensive condition-specific cultivations and  
494 measurements beforehand. (2) If the model is constrained with uptake- and secretion rates of

495 carbon source(s), amino acids and byproducts of the strain and condition under study, how well do  
496 the model predictions (light green bars in figure 4) compare to *in vivo* results? Here the model was  
497 allowed, but not forced, to take up (lower bound constrained, upper bound unconstrained) and  
498 secrete (lower bound unconstrained, upper bound constrained) metabolites according to the  
499 experimental data. This tells us if the model, when imposed with realistic limitations, “chooses” a flux  
500 distribution which results in extracellular fluxes of metabolites in line with *in vivo* data. In both cases,  
501 the constrained amino acids only included Arg, Ser, Asn, Asp and Glu as before (see section 3.2.1)  
502 and in case 1 the allowed glycerol uptake rate was arbitrarily limited to 25 mmol gDW<sup>-1</sup> h<sup>-1</sup>, when  
503 glycerol effects were being predicted.

504 The flux maps in Figure 4 show results for case 1 (dark green bars). The predicted uptake of glucose  
505 and glycerol (dark green bars in figure 4b) is higher than observed *in-vivo* (light orange bars in figure  
506 4b), resulting in higher secretion of by-products and a higher growth rate as well. However, the  
507 distribution of secreted by-products is very similar. The effect of glycerol can be predicted quite well  
508 with the model as ethanol secretion decreases and acetate secretion increases, relative to glucose  
509 uptake, and 1,3-propanediol is secreted in large amounts (compared to graphs in Figure 4a). Several  
510 studies have described an increased growth rate in *L. reuteri* when glycerol is added to a glucose-  
511 based medium (in flasks and bioreactors), which is to be expected based on inspection of redox  
512 balance (Chen et al., 2016; Santos, 2008; Talarico et al., 1990) and this is also what we observed *in*  
513 *silico* in case 1. However, *in vivo* we consistently observed a small decrease in growth rate for this  
514 strain when glycerol was added (Additional file 1).

515 In line with existing literature reports (Chen et al., 2016), knocking out the *adhE* gene has dramatic  
516 effects on the metabolism when glucose is the sole carbon source, both *in vivo* and *in silico* (Figure  
517 4c). This is due to redox imbalance since AdhE no longer recycles the NADH generated in glycolysis.  
518 The predictions in case 1 show highly decreased uptake of glucose, yet a small amount of glucose is  
519 still taken up, resulting in acetate and lactate production. As discussed in 3.2.1, it is possible that  
520 glucose is being taken up *in vivo*, even though this is not detected by measurements, which is in line  
521 with model predictions and would also explain the lower growth rate observed *in silico* in case 2  
522 compared to *in vivo*. The higher growth rate *in vivo* compared to *in silico* in case 1 is due to a much  
523 higher arginine uptake than measured in the WT. Also, in line with published studies (Chen et al.,  
524 2016), addition of glycerol to the *adhE* mutant increases the growth rate to almost WT levels (Figure  
525 4d). Similarly to the WT predictions, the model in case 1 predicts slightly higher growth rate and  
526 uptake rates of glucose and glycerol, resulting in higher secretion of by-products. But as before, the  
527 flux distribution is very similar to the one measured *in vivo*.

528 In all four conditions in figure 4 the *in silico* predictions in case 2 and the *in vivo* data are almost  
529 identical, with the exception of the few instances described above. In few cases discrepancies can be  
530 explained by carbon imbalance *in vivo*, which is most likely due to measurement  
531 uncertainties. Taken together, these results show that the model can be used to accurately predict  
532 metabolic behavior, without requiring extensive experimental data.

### 533 3.2.3 Predicted effects of an active 1,2-propanediol pathway

534 *L. reuteri* JCM 1112 appears to lack only one enzyme, methylglyoxal synthase (MGS) in the 1,2-  
535 propanediol- and 1-propanol biosynthetic pathways (see section 3.1.1). Here we used the model to  
536 predict how *mgs* gene insertion would affect the metabolism, specifically in the *adhE* mutant grown  
537 on glucose. The mutant grows poorly on glucose due to redox imbalance (section 3.2.2). The  
538 synthesis of both 1,2-propanediol and 1-propanol consume NADH and activating these pathways  
539 therefore has the potential to restore growth. As in case 1 above, the model was constrained only  
540 with experimental uptake rates of glucose and the 5 amino acids from the WT grown on glucose. The  
541 *adhE* gene was knocked out *in silico*, and we then compared flux predictions with an added *mgs*  
542 (Figure 5) and without it (Figure 4c). The *mgs* addition resulted in a highly increased growth rate  
543 ( $0.11$  to  $0.49 \text{ h}^{-1}$ ) as well as growth-coupled production of 1-propanol ( $14.7 \text{ mmol gDW}^{-1} \text{ h}^{-1}$ ). Given  
544 the good agreement between *in silico* predictions and *in vivo* measurements in section 3.2.2, the  
545 expression of this gene at a sufficiently high level *in vivo* is expected to result in a relatively fast  
546 growing 1-propanol producing cell factory.

### 547 3.2.4 Model-based analysis of *L. reuteri* as a cell factory

548 LAB are natural producers of several chemicals of industrial interest (Bosma et al., 2017; Papagianni,  
549 2012; Sauer, Russmayer, Grabherr, Peterbauer, & Marx, 2017). They possess high sugar uptake rates  
550 and, in many species, the central metabolism is only weakly coupled to biomass formation because  
551 of their adaptation to nutrient rich environments. As a result, the carbon source is mostly used for  
552 energy gain and is converted to fermentation products in high yields. Combined with high tolerance  
553 to environmental stress, these properties have led to significant interest in using LAB as cell factories.

554 The heterofermentative nature of *L. reuteri* and the dominance of the phosphoketolase over the  
555 Embden-Meyerhof-Parnas pathway make some target compounds less suitable than others, with  
556 lactic acid being an obvious example. On the other hand, these properties can also be used to an  
557 advantage as is demonstrated here We used our newly established *L. reuteri* metabolic model to  
558 study the feasibility of this organism to produce some of the compounds that have been the subject  
559 of recently published LAB metabolic engineering experiments. These native and non-native  
560 compounds include a flavoring compound (acetoin), a food additive (L-alanine), biofuels (1-propanol

561 and ethanol), chemical building blocks (acetaldehyde and 2,3-butanediol) and an environmentally  
562 friendly solvent (ethyl lactate). The last compound has recently been produced in an engineered *E.*  
563 *coli* strain (Lee & Trinh, 2018) and is an interesting target in *L. reuteri* since it is a condensation  
564 product of the two major products of glucose fermentation via the phosphoketolase pathway, lactate  
565 and ethanol.

566 The suitability of *L. reuteri* for producing a particular compound was assessed in terms of the  
567 maximum theoretical yield, using a fixed glucose uptake rate (Table 4). This gives an overly optimistic  
568 estimate of product yields in most cases since it completely ignores variations in enzyme efficiency,  
569 compound toxicity, regulation and other issues outside the scope of the model. The maximum flux is  
570 still useful to identify products that appear to be ill suited for a particular metabolism as well as  
571 products that may be suitable.

572 The predicted flux for acetaldehyde, acetoin and 2,3-butanediol, which are all derived from acetyl-  
573 CoA, was low, suggesting that the metabolism in the wild type is not well suited for overproducing  
574 these compounds. The flux increased significantly upon addition of methylglyoxal synthase,  
575 suggesting the importance of the 1-propanol pathway in cofactor balancing (section 3.2.3). Addition  
576 of glycerol to the medium served the same purpose and increased the predicted flux in all cases (data  
577 not shown), which is in line with glycerol being known and used as an external electron sink in *L.*  
578 *reuteri* (Dishisha et al., 2014). For all the compounds except ethanol and 1-propanol, the addition of a  
579 fully functional phosphofructokinase was predicted to increase the yields even further (Table 4). Such  
580 a strategy has been shown successful for mannitol production (Papagianni & Legiša, 2014).

581 Taken together, the model suggests that *L. reuteri* is better suited for producing compounds derived  
582 from pyruvate than compounds derived from acetyl-CoA and that the simultaneous expression of  
583 heterologous MGSA and PFK enzymes is a general metabolic engineering strategy for increasing  
584 product yields in *L. reuteri*.

## 585 4. Conclusions

586 In this study, we have established a manually curated genome-scale metabolic model of *L. reuteri*  
587 JCM 1112, referred to as Lreuteri\_530, and validated it with experimental data. We identified several  
588 knowledge gaps in the metabolism of this organism that we resolved with a combination of  
589 experimentation and modeling. The distribution of flux between the PKP and EMPP pathways is  
590 strain-specific and in line with other studies, we found that the EMPP activity is maximally around 7%  
591 of total glycolytic flux during early exponential phase. The predictive accuracy of the model was  
592 estimated by comparing predictions with experimental data. Several scenarios were tested both *in*  
593 *vivo* and *in silico*, including addition of glycerol to a glucose-based growth medium and the deletion  
594 of the *adhE* gene, which encodes a bifunctional aldehyde/alcohol dehydrogenase. The results  
595 showed that the model gives accurate predictions, both with respect to growth rate and uptake- and  
596 secretion rates of main metabolites in the central metabolism. This indicates that the model can be  
597 useful for predicting metabolic engineering strategies, such as growth-coupled production of 1-  
598 propanol. The model also serves as a starting point for the modeling of other *L. reuteri* strains and  
599 related species. The model is available in SBML, Matlab and JSON formats at  
600 <https://github.com/steinng/reuteri> as well as in Additional file 6. Metabolic maps in Escher format  
601 are provided in Additional file 4. The Escher maps together with the model in JSON format can be  
602 used directly with the Escher-FBA online tool (Rowe, Palsson, & King, 2018) as well as the Caffeine  
603 cell factory design and analysis platform (<https://caffeine.dd-decaf.eu/>).

## 604 5. Declarations

### 605 Ethics approval and consent to participate

606 Not applicable.

### 607 Consent for publication

608 Not applicable.

### 609 Availability of data and material

610 The model, experimental data, code and other relevant material are available from  
611 [github.com/steinng/reuteri](https://github.com/steinng/reuteri) and Additional files.

### 612 Competing interests

613 The authors declare that they have no competing interests.

### 614 Funding

615 This study was supported by the Marine Biotechnology ERA-NET *ThermoFactories* project grant  
616 number 5178–00003B; the Technology Development fund in Iceland grant number 159004-0612; The  
617 Novo Nordisk Foundation in Denmark; and the European Union's Horizon 2020 research and  
618 innovation programme under grant agreement No 686070 (DD-DeCaF).

### 619 Authors' contributions

620 TK and SG curated and validated the metabolic reconstruction, performed numerical simulations and  
621 wrote the manuscript. EFB performed all experimental work except the bioreactor cultivations,  
622 performed data processing and analysis, curated the metabolic reconstruction and wrote the  
623 manuscript. FBdS constructed the draft model, performed bioreactor cultivations, analyzed the  
624 resulting data and revised the manuscript. EÖ curated the original draft metabolic reconstruction,  
625 processed and analyzed the genome sequencing data and revised the manuscript. ATN and MJH  
626 were involved in the metabolic reconstruction and revised the manuscript. BSF and LF performed a  
627 bioreactor cultivation, analyzed the resulting data and revised the manuscript. EFB, TK, SG and ATN  
628 conceived and coordinated this study. All authors read and approved the final manuscript.

## 629 Acknowledgements

630 The authors would like to thank Bjarke Krysel Christensen, Steen Troels Jørgensen and Brian  
631 Kobmann from Novozymes for providing strain SJ11774; Anna Koza from DTU Biosustain for  
632 performing the genome sequencing; Amalie Melton Axelsen from DTU Biosustain for technical  
633 support with construction and analysis of the *adhE* mutant strain.

## 634 References

- 635 Altaras, N. E., & Cameron, D. C. (1999). Metabolic engineering of a 1,2-propanediol pathway in  
636 *Escherichia coli*. *Applied and Environmental Microbiology*, *65*(3), 1180–1185. Retrieved from  
637 <http://ovidsp.ovid.com/ovidweb.cgi?T=JS&PAGE=reference&D=emed4&NEWS=N&AN=199908>  
638 6179
- 639 Årsköld, E., Lohmeier-Vogel, E., Cao, R., Roos, S., Rådström, P., & Van Niel, E. W. J. (2008).  
640 Phosphoketolase pathway dominates in *Lactobacillus reuteri* ATCC 55730 containing dual  
641 pathways for glycolysis. *Journal of Bacteriology*, *190*(1), 206–212.  
642 <https://doi.org/10.1128/JB.01227-07>
- 643 Bosma, E. F., Forster, J., & Nielsen, A. T. (2017). Lactobacilli and pediococci as versatile cell factories –  
644 Evaluation of strain properties and genetic tools. *Biotechnology Advances*, *35*(4), 419–442.  
645 <https://doi.org/10.1016/j.biotechadv.2017.04.002>
- 646 Burgé, G., Saulou-Bérion, C., Moussa, M., Allais, F., Athes, V., & Spinnler, H.-E. (2015). Relationships  
647 between the use of Embden Meyerhof pathway (EMP) or Phosphoketolase pathway (PKP) and  
648 lactate production capabilities of diverse *Lactobacillus reuteri* strains. *J. Microbiol.*, *53*(10), 702–  
649 710. <https://doi.org/10.1007/s12275-015-5056-x>
- 650 Chen, L., Bromberger, P. D., Nieuwenhuijs, G., & Hatti-Kaul, R. (2016). Redox balance in *Lactobacillus*  
651 *reuteri* DSM20016: Roles of iron-dependent alcohol dehydrogenases in glucose/glycerol  
652 metabolism. *PLoS ONE*, *11*(12), 1–20. <https://doi.org/10.1371/journal.pone.0168107>
- 653 Christensen, B., Olsen, P. B., Regueira, T. B., Koebmann, B., Joergensen, S. T., & Dehli, T. I. (2014).  
654 *International Publication Number WO 2014/102180 A1*. Retrieved from  
655 <https://www.google.com/patents/WO2014102180A1?cl=en>
- 656 Dauner, M., & Sauer, U. (2001). Stoichiometric Growth Model for Riboflavin-Producing *Bacillus*  
657 *subtilis*. *Biotechnology and Bioengineering*, *76*(2), 132–143.
- 658 Dauner, M., Storni, T., & Sauer, U. W. E. (2001). *Bacillus subtilis* Metabolism and Energetics in  
659 Carbon-Limited and Excess-Carbon Chemostat Culture. *Journal of Bacteriology*, *183*(24), 7308–  
660 7317. <https://doi.org/10.1128/JB.183.24.7308>
- 661 Deatherage, D. E., & Barrick, J. E. (2014). Identification of mutations in laboratory-evolved microbes  
662 from next-generation sequencing data using breseq. *Methods in Molecular Biology (Clifton,*  
663 *N.J.)*, *1151*, 165–188. [https://doi.org/10.1007/978-1-4939-0554-6\\_12](https://doi.org/10.1007/978-1-4939-0554-6_12)
- 664 Dishisha, T., Pereyra, L. P., Pyo, S.-H., Britton, R. A., & Hatti-Kaul, R. (2014). Flux analysis of the  
665 *Lactobacillus reuteri* propanediol-utilization pathway for production of 3-  
666 hydroxypropionaldehyde, 3-hydroxypropionic acid and 1,3-propanediol from glycerol. *Microbial*  
667 *Cell Factories*, *13*, 76. <https://doi.org/10.1186/1475-2859-13-76>
- 668 Ebrahim, A., Lerman, J. A., Palsson, B. O., & Hyduke, D. R. (2013). COBRApy: COntstraints-Based  
669 Reconstruction and Analysis for Python. *BMC Systems Biology*, *7*. [https://doi.org/10.1186/1752-](https://doi.org/10.1186/1752-0509-7-74)  
670 0509-7-74
- 671 Etzold, S., MacKenzie, D. A., Jeffers, F., Walshaw, J., Roos, S., Hemmings, A. M., & Juge, N. (2014).  
672 Structural and molecular insights into novel surface-exposed mucus adhesins from *L*  
673 *actobacillus reuteri* human strains. *Molecular Microbiology*, *92*(3), 543–556.  
674 <https://doi.org/10.1111/mmi.12574>
- 675 Feist, A. M., & Palsson, B. O. (2010). The Biomass Objective Function. *Curr Opin Microbiol.*, *13*(3),  
676 344–349. <https://doi.org/10.1016/j.mib.2010.03.003>.The
- 677 Fell, D. A., & Small, J. R. (1986). Fat synthesis in adipose tissue. An examination of stoichiometric



- 678 constraints. *Biochem. J.*, 238, 781–786. Retrieved from papers2://publication/uuid/8769978F-  
679 05AC-4552-A757-C25899C9BACC
- 680 Frese, S. A., Benson, A. K., Tannock, G. W., Loach, D. M., Kim, J., Zhang, M., ... Walter, J. (2011). The  
681 Evolution of Host Specialization in the Vertebrate Gut Symbiont *Lactobacillus reuteri*. *PLoS*  
682 *Genetics*, 7(2), e1001314. <https://doi.org/10.1371/journal.pgen.1001314>
- 683 Galinier, A., & Deutscher, J. (2017). Sophisticated Regulation of Transcriptional Factors by the  
684 Bacterial Phosphoenolpyruvate: Sugar Phosphotransferase System. *Journal of Molecular*  
685 *Biology*, 429(6), 773–789. <https://doi.org/10.1016/J.JMB.2017.02.006>
- 686 Gandhi, N. N., Cobra, P. F., Steele, J. L., Markley, J. L., & Rankin, S. A. (2018). *Lactobacillus*  
687 demonstrate thiol-independent metabolism of methylglyoxal: Implications toward browning  
688 prevention in Parmesan cheese. *Journal of Dairy Science*, 101(2), 968–978.  
689 <https://doi.org/10.3168/jds.2017-13577>
- 690 Gänzle, M. G., Vermeulen, N., & Vogel, R. F. (2007). Carbohydrate, peptide and lipid metabolism of  
691 lactic acid bacteria in sourdough. *Food Microbiology*, 24(2), 128–138.  
692 <https://doi.org/10.1016/J.FM.2006.07.006>
- 693 Görke, B., & Stülke, J. (2008). Carbon catabolite repression in bacteria: many ways to make the most  
694 out of nutrients. *Nature Reviews Microbiology*, 6(8), 613–624.  
695 <https://doi.org/10.1038/nrmicro1932>
- 696 Joergensen, S. T., Rgueira, T. B., Kobmann, B., Olsen, P. B., & Christensen, B. (2015). *US*  
697 *2015O125959A1*. <https://doi.org/10.1093/iwc/iwv022>
- 698 Kandler, O., Stetter, K.-O., & Köhl, R. (1980). *Lactobacillus reuteri* sp. nov., a New Species of  
699 Heterofermentative Lactobacilli. *Zentralblatt Für Bakteriologie: I. Abt. Originale C: Allgemeine,*  
700 *Angewandte Und Ökologische Mikrobiologie*, 1(3), 264–269. [https://doi.org/10.1016/S0172-5564\(80\)80007-8](https://doi.org/10.1016/S0172-5564(80)80007-8)
- 702 Kang, T. S., Korber, D. R., & Tanaka, T. (2013). Regulation of dual glycolytic pathways for fructose  
703 metabolism in heterofermentative *Lactobacillus panis* PM1. *Applied and Environmental*  
704 *Microbiology*, 79(24), 7818–7826. <https://doi.org/10.1128/AEM.02377-13>
- 705 King, Z. A., Dräger, A., Ebrahim, A., Sonnenschein, N., Lewis, N. E., & Palsson, B. O. (2015). Escher: A  
706 Web Application for Building, Sharing, and Embedding Data-Rich Visualizations of Biological  
707 Pathways. *PLoS Computational Biology*, 11(8), 1–13.  
708 <https://doi.org/10.1371/journal.pcbi.1004321>
- 709 King, Z. A., Lu, J., Dräger, A., Miller, P., Federowicz, S., Lerman, J. A., ... Lewis, N. E. (2016). BiGG  
710 Models: A platform for integrating, standardizing and sharing genome-scale models. *Nucleic*  
711 *Acids Research*, 44(D1), D515–D522. <https://doi.org/10.1093/nar/gkv1049>
- 712 Koduru, L., Kim, Y., Bang, J., Lakshmanan, M., Han, N. S., & Lee, D.-Y. (2017). Genome-scale modeling  
713 and transcriptome analysis of *Leuconostoc mesenteroides* unravel the redox governed  
714 metabolic states in obligate heterofermentative lactic acid bacteria. *Scientific Reports*, 7(1),  
715 15721. <https://doi.org/10.1038/s41598-017-16026-9>
- 716 Ksonzeková, P., Bystricky, P., Vlcková, S., Pätoprst, V., Pulzová, L., Mudronová, D., ... Tkáčiková, L.  
717 (2016). Exopolysaccharides of *Lactobacillus reuteri* : Their influence on adherence of *E. coli* to  
718 epithelial cells and inflammatory response. *Carbohydrate Polymers*, 141, 10–19.  
719 <https://doi.org/10.1016/j.carbpol.2015.12.037>
- 720 Landete, J. M., Ferrer, S., Monedero, V., & Zúñiga, M. (2013). Malic enzyme and malolactic enzyme  
721 pathways are functionally linked but independently regulated in *Lactobacillus casei* BL23.  
722 *Applied and Environmental Microbiology*, 79(18), 5509–5518.  
723 <https://doi.org/10.1128/AEM.01177-13>

- 724 Lee, J.-W., & Trinh, C. T. (2018). De novo Microbial Biosynthesis of a Lactate Ester Platform. *BioRxiv*,  
725 498576. <https://doi.org/10.1101/498576>
- 726 Lewis, N. E., Hixson, K. K., Conrad, T. M., Lerman, J. A., Charusanti, P., Polpitiya, A. D., ... Palsson, B.  
727 (2010). Omic data from evolved *E. coli* are consistent with computed optimal growth from  
728 genome-scale models. *Molecular Systems Biology*, 6(390).  
729 <https://doi.org/10.1038/msb.2010.47>
- 730 Lieven, C., Beber, M. E., Olivier, B. G., Bergmann, F. T., Ataman, M., Babaei, P., ... Zhang, C. (2018).  
731 Memote: A community-driven effort towards a standardized genome-scale metabolic model  
732 test suite. *BioRxiv*, 350991. <https://doi.org/10.1101/350991>
- 733 Liu, X. T., Hou, C. L., Zhang, J., Zeng, X. F., & Qiao, S. Y. (2014). Fermentation conditions influence the  
734 fatty acid composition of the membranes of *Lactobacillus reuteri* I5007 and its survival  
735 following freeze-drying. *Letters in Applied Microbiology*, 59, 398–403.  
736 <https://doi.org/10.1111/lam.12292>
- 737 Morita, H., Toh, H., Fukuda, S., Horikawa, H., Oshima, K., Suzuki, T., ... Hattori, M. (2008).  
738 Comparative Genome Analysis of *Lactobacillus reuteri* and *Lactobacillus fermentum* Reveal a  
739 Genomic Island for Reuterin and Cobalamin Production. *DNA Research*, 15(3), 151–161.  
740 <https://doi.org/10.1093/dnares/dsn009>
- 741 Oliveira, A. P., Nielsen, J., & Förster, J. (2005). Modeling *Lactococcus lactis* using a genome-scale flux  
742 model. *BMC Microbiology*, 5(1). <https://doi.org/10.1186/1471-2180-5-39>
- 743 Papagianni, M. (2012). Metabolic engineering of lactic acid bacteria for the production of industrially  
744 important compounds. *Comput Struct Biotechnol J.*, 3(October), 1–8.  
745 <https://doi.org/10.5936/csbj.201210003>
- 746 Papagianni, M., & Legiša, M. (2014). Increased mannitol production in *Lactobacillus reuteri* ATCC  
747 55730 production strain with a modified 6-phosphofructo-1-kinase. *J. Biotechnol.*, 181, 20–26.  
748 <https://doi.org/http://dx.doi.org/10.1016/j.jbiotec.2014.04.007>
- 749 Pastink, M. I., Teusink, B., Hols, P., Visser, S., De Vos, W. M., & Hugenholtz, J. (2009). Genome-scale  
750 model of *Streptococcus thermophilus* LMG18311 for metabolic comparison of lactic acid  
751 bacteria. *Applied and Environmental Microbiology*, 75(11), 3627–3633.  
752 <https://doi.org/10.1128/AEM.00138-09>
- 753 Rau, M. H., & Zeidan, A. A. (2018). Constraint-based modeling in microbial food biotechnology.  
754 *Biochemical Society Transactions*, 46(2), 249–260. <https://doi.org/10.1042/BST20170268>
- 755 Ricci, M. A., Russo, A., Pisano, I., Palmieri, L., Angelis, M. de, & Agrimi, G. (2015). Improved 1,3-  
756 Propanediol Synthesis from Glycerol by the Robust *Lactobacillus reuteri* Strain DSM 20016.  
757 *Journal of Microbiology and Biotechnology*, 25(6), 893–902.  
758 <https://doi.org/10.4014/jmb.1411.11078>
- 759 Romano, A. H., Trifone, J. D., & Brustolon, M. (1979). Distribution of the  
760 phosphoenolpyruvate:glucose phosphotransferase system in fermentative bacteria. *Journal of*  
761 *Bacteriology*, 139(1), 93–97. Retrieved from <http://jb.asm.org/content/139/1/93.abstract>
- 762 Rowe, E., Palsson, B. O., & King, Z. A. (2018). Escher-FBA : a web application for interactive flux  
763 balance analysis. *BMC Systems Biology*, 12(84), 1–7.
- 764 Saier, M. H. (2000). Families of transmembrane sugar transport proteins. *Molecular Microbiology*,  
765 35(4), 699–710. <https://doi.org/10.1046/j.1365-2958.2000.01759.x>
- 766 Santos, F. (2008). *Vitamin B12 synthesis in Lactobacillus reuteri*. Wageningen University.
- 767 Santos, F., Vera, J. L., Lamosa, P., de Valdez, G. F., de Vos, W. M., Santos, H., ... Hugenholtz, J. (2007).  
768 Pseudovitamin B12 is the corrinoid produced by *Lactobacillus reuteri* CRL1098 under anaerobic

- 769 conditions. *FEBS Letters*, 581(25), 4865–4870. <https://doi.org/10.1016/j.febslet.2007.09.012>
- 770 Santos, F., Vera, J. L., van der Heijden, R., Valdez, G., de Vos, W. M., Sesma, F., & Hugenholtz, J.  
771 (2008). The complete coenzyme B12 biosynthesis gene cluster of *Lactobacillus reuteri* CRL 1098.  
772 *Microbiology*, 154(1), 81–93. <https://doi.org/10.1099/mic.0.2007/011569-0>
- 773 Sauer, M., Russmayer, H., Grabherr, R., Peterbauer, C. K., & Marx, H. (2017). The Efficient Clade:  
774 Lactic Acid Bacteria for Industrial Chemical Production. *Trends in Biotechnology*, 35(8), 756–769.  
775 <https://doi.org/10.1016/J.TIBTECH.2017.05.002>
- 776 Saulnier, D. M., Santos, F., Roos, S., Mistretta, T.-A., Spinler, J. K., Molenaar, D., ... Versalovic, J.  
777 (2011). Exploring Metabolic Pathway Reconstruction and Genome-Wide Expression Profiling in  
778 *Lactobacillus reuteri* to Define Functional Probiotic Features. *PLoS ONE*, 6(4), e18783.  
779 <https://doi.org/10.1371/journal.pone.0018783>
- 780 Savinell, J. M., & Palsson, B. O. (1992). Network analysis of intermediary metabolism using linear  
781 optimization. I. Development of mathematical formalism. *Journal of Theoretical Biology*, 154(4),  
782 421–454.
- 783 Sriramulu, D. D., Liang, M., Hernandez-Romero, D., Raux-Deery, E., Lünsdorf, H., Parsons, J. B., ...  
784 Prentice, M. B. (2008). *Lactobacillus reuteri* DSM 20016 produces cobalamin-dependent diol  
785 dehydratase in metabolosomes and metabolizes 1,2-propanediol by disproportionation. *Journal*  
786 *of Bacteriology*, 190(13), 4559–4567. <https://doi.org/10.1128/JB.01535-07>
- 787 Sun, Z., Harris, H. M. B., McCann, A., Guo, C., Argimón, S., Zhang, W., ... O'Toole, P. W. (2015).  
788 Expanding the biotechnology potential of lactobacilli through comparative genomics of 213  
789 strains and associated genera. *Nat. Commun.*, 6, 8322.  
790 <https://doi.org/10.1038/ncomms9322>[http://www.nature.com/articles/ncomms9322#supplem](http://www.nature.com/articles/ncomms9322#supplementary-information)  
791 [entary-information](http://www.nature.com/articles/ncomms9322#supplementary-information)
- 792 Talarico, T. L., Axelsson, L. T., Novotny, J., Fiuzat, M., & Dobrogosz, W. J. (1990). Utilization of Glycerol  
793 as a Hydrogen Acceptor by *Lactobacillus reuteri*: Purification of 1,3-Propanediol:NAD  
794 Oxidoreductase. *Applied and Environmental Microbiology*, 56(4), 943–948. Retrieved from  
795 <http://www.ncbi.nlm.nih.gov/pubmed/16348177>
- 796 Talarico, T. L., & Dobrogosz, W. J. (1989). Chemical characterization of an antimicrobial substance  
797 produced by *Lactobacillus reuteri*. *Antimicrobial Agents and Chemotherapy*, 33(5), 674–679.  
798 <https://doi.org/10.1128/AAC.33.5.674>
- 799 Tempest, D. W., & Neijssel, O. (1984). The status of YATP and maintenance energy as biologically  
800 interpretable phenomena. *Annual Review of Microbiology*, 38, 459–486.
- 801 Teusink, B., Enkevort, F. H. J. Van, Francke, C., Wiersma, A., Wegkamp, A., Smid, E. J., ... Siezen, R. J.  
802 (2005). In silico reconstruction of the metabolic pathways of *Lactobacillus plantarum*:  
803 comparing predictions of nutrient requirements with those from growth experiments. *Appl.*  
804 *Environ. Microbiol.*, 71(11), 7253–7262. <https://doi.org/10.1128/AEM.71.11.7253>
- 805 Teusink, B., Wiersma, A., Molenaar, D., Francke, C., Vos, W. M. De, Siezen, R. J., & Smid, E. J. (2006).  
806 Analysis of Growth of *Lactobacillus plantarum* WCFS1 on a Complex Medium Using a Genome-  
807 scale Metabolic Model. *The Journal of Biological Chemistry*, 281(52), 40041–40048.  
808 <https://doi.org/10.1074/jbc.M606263200>
- 809 Walter, J., Loach, D. M., Alqumber, M., Rockel, C., Hermann, C., Pfitzenmaier, M., & Tannock, G. W.  
810 (2007). D-Alanyl ester depletion of teichoic acids in *Lactobacillus reuteri* 100-23 results in  
811 impaired colonization of the mouse gastrointestinal tract. *Environmental Microbiology*, 9(7),  
812 1750–1760. <https://doi.org/10.1111/j.1462-2920.2007.01292.x>
- 813 Yamada, K., & Tani, Y. (2011). Glycerol dehydrogenase and dihydroxyacetone reductase of a  
814 methylotrophic yeast, *Hansenula ofunaensis*. *Agricultural and Biological Chemistry*, 52(3), 711–

- 815           719. <https://doi.org/10.1271/bbb1961.52.711>
- 816   Zhao, X., & Gänzle, M. G. (2018). Genetic and phenotypic analysis of carbohydrate metabolism and  
817           transport in *Lactobacillus reuteri*. *International Journal of Food Microbiology*, 272(August 2017),  
818           12–21. <https://doi.org/10.1016/j.ijfoodmicro.2018.02.021>
- 819   Zheng, J., Ruan, L., Sun, M., & Gänzle, M. (2015). A Genomic View of Lactobacilli and Pediococci  
820           Demonstrates that Phylogeny Matches Ecology and Physiology. *Applied and Environmental*  
821           *Microbiology*, 81(20), 7233–7243. <https://doi.org/10.1128/AEM.02116-15>
- 822
- 823

824 **TABLES**

825

826 **Table 1. *Lactobacillus reuteri* strains used in this study.**

| Strain name                   | Description/genotype                                                                                                                              | Origin/reference                        |
|-------------------------------|---------------------------------------------------------------------------------------------------------------------------------------------------|-----------------------------------------|
| JCM 1112<br>(DSM 20016, 'WT') | Wild-type                                                                                                                                         | DSMZ <sup>1</sup>                       |
| SJ11774 ('SJ<br>(WT*')        | Strain JCM 1112 (DSM 20016) with two inactivated restriction-modification systems ( $\Delta$ LAR_0818/Lreu_0873 $\Delta$ LAR_1344/Lreu_1433::cat) | Novozymes; patent WO2014102180 A1       |
| SJ $\Delta$ adhE              | Strain SJ11774 with a clean and full in-frame deletion of the bifunctional aldehyde/alcohol dehydrogenase adhE (LAR_0310/Lreu_0321)               | Unpublished (manuscript in preparation) |

827 <sup>1</sup> DSMZ = Deutsche Sammlung von Mikroorganismen und Zellkulturen.

828

829

830

831

832 **Table 2. Experimental datasets used for the model reconstruction.**

| Strain           | Substrate          | Growth mode | Nr of replicates | Used in:                                                           |
|------------------|--------------------|-------------|------------------|--------------------------------------------------------------------|
| WT               | Glucose            | Flask       | 2                | Determining energy requirements (section 2.4 and 3.1.2)            |
| WT               | Glucose            | Reactor     | 3                | Model validation (A in Figure 3)                                   |
| WT               | Glucose + glycerol | Reactor     | 2                | Model validation (B in Figure 3)                                   |
| SJ<br>(WT*)      | Glucose            | Flask       | 3                | Model validation (C in Figure 3) and model predictions (Figure 4a) |
| SJ<br>(WT*)      | Glucose + glycerol | Flask       | 3                | Model validation (D in Figure 3) and model predictions (Figure 4b) |
| SJ $\Delta$ adhE | Glucose            | Flask       | 3                | Model validation (E in Figure 3) and model predictions (Figure 4c) |
| SJ $\Delta$ adhE | Glucose + glycerol | Flask       | 3                | Model validation (F in Figure 3) and model predictions (Figure 4d) |

833 *Growth curves and uptake and secretion data can be found in Additional file 1.*

834 **Table 3. Main characteristics of *Lreuteri\_530* - the *L. reuteri* JCM 1112 genome-scale metabolic**  
 835 **reconstruction.**

| <b>Genome characteristics</b>  |           |
|--------------------------------|-----------|
| Genome size                    | 2.04 Mb   |
| Total protein coding sequences | 1943      |
| <b>Model characteristics</b>   |           |
| Genes                          | 530       |
| Percentage of genome           | 27%       |
| Reactions (with GPR)           | 710 (690) |
| Metabolites (unique)           | 658 (551) |
| Memote total score             | 62%       |

836

837

838 **Table 4. Model predictions of the maximum flux of selected target compounds in *L. reuteri* assuming a**  
 839 **maximum glucose uptake rate of 25.2 mmol gDW<sup>-1</sup> h<sup>-1</sup>.**

| Compound            | Maximum flux [mmol gDW <sup>-1</sup> h <sup>-1</sup> ] | Maximum carbon yield |            |
|---------------------|--------------------------------------------------------|----------------------|------------|
|                     |                                                        | MGSA                 | MGSA, ↑PFK |
| Ethanol             | 50.4                                                   | 50.4                 | 67%        |
| Acetaldehyde        | 0                                                      | 31.5                 | 50%        |
| 1-propanol (n-n)    | 20.2                                                   | 20.2                 | 40%        |
| L-alanine (n-n)     | 27.0                                                   | 27.0                 | 100%       |
| Acetoin             | 0                                                      | 10.1                 | 50%        |
| 2,3-butanediol      | 0                                                      | 11.6                 | 57%        |
| Ethyl lactate (n-n) | 20.4                                                   | 20.4                 | 83%        |

840 *MGSA* indicates the presence of methylglyoxal synthase in the model, ↑*PFK* indicates the presence of a  
 841 phosphofructokinase that is not flux-limiting. Non-native compounds are indicated with (n-n).

842 **FIGURES**  
843

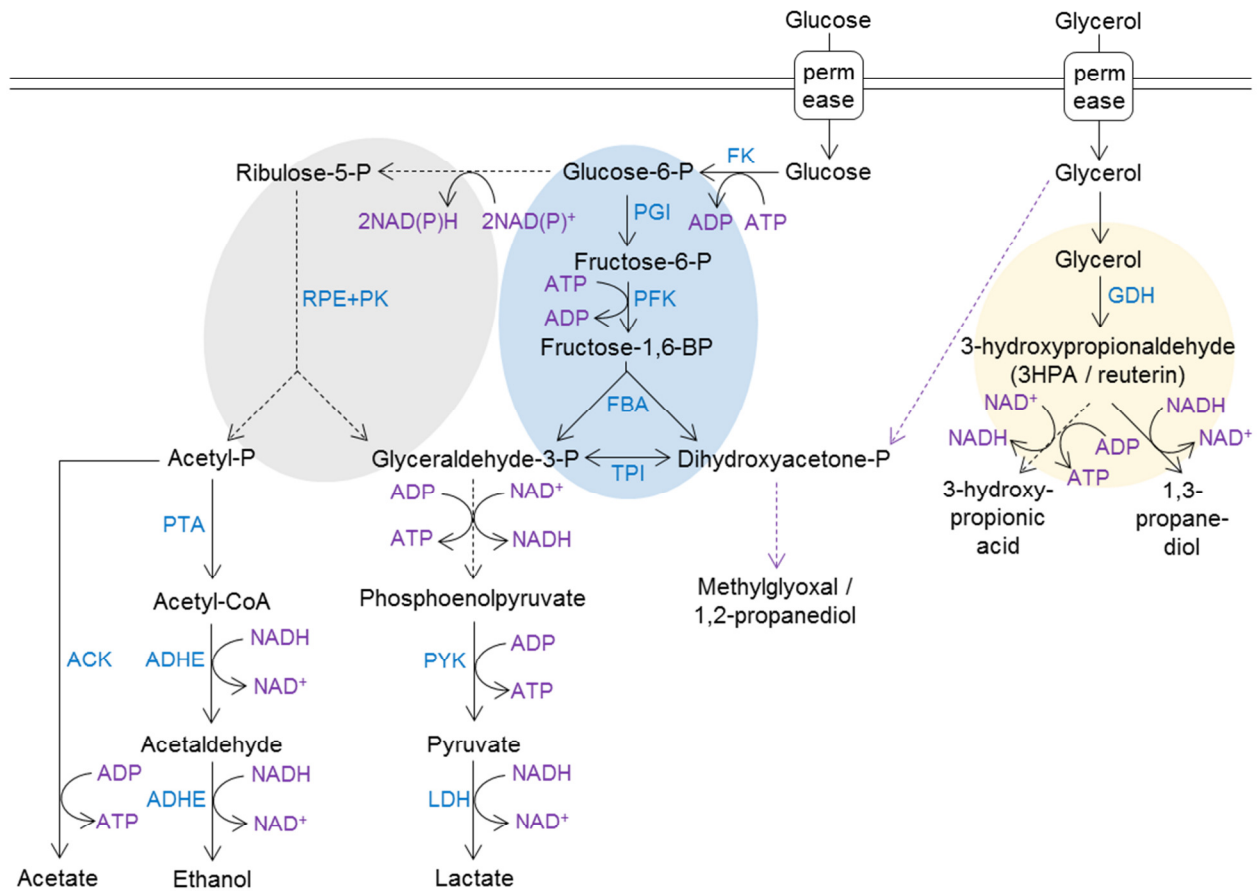

844

845 **Figure 1. Condensed overview of the central metabolism in *L. reuteri*.** Dotted purple arrows indicate pathways  
846 for which genes or homologs are present but likely not active in *L. reuteri* JCM 1112. Dotted black arrows  
847 indicate multiple enzymatic steps. Yellow background circle indicates microcompartment; blue background  
848 indicates the EMP pathway; grey background indicates the phosphoketolase pathway. Abbreviations: FK:  
849 fructokinase/glucokinase; PGI: glucose-6-phosphate isomerase; PFK: phosphofructokinase; FBA: fructose-bis-  
850 phosphate aldolase; TPI: triosephosphate isomerase; PGM: phosphoglucomutase; SP: sucrose phosphorylase;  
851 M2DH: mannitol-2-dehydrogenase; RPE+PK: ribulose epimerase + phosphoketolase; GDH: glycerol dehydratase  
852 I. Adapted from (Bosma et al., 2017).

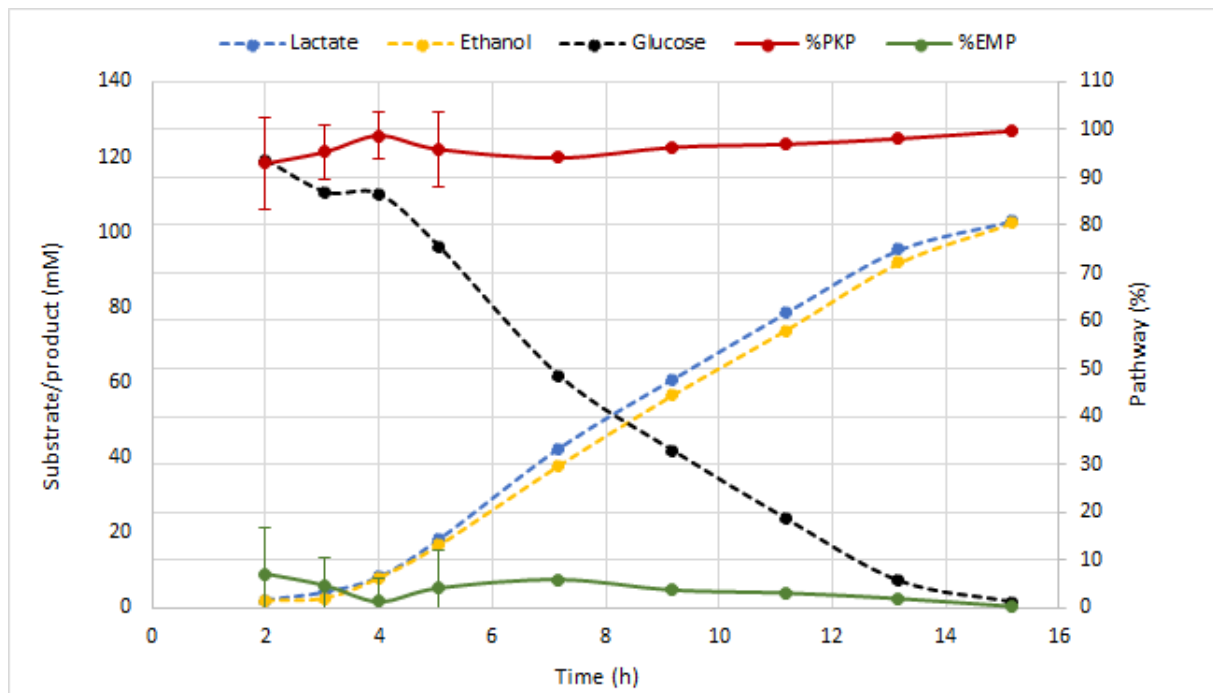

853  
854  
855  
856  
857  
858

**Figure 2. Typical fermentation profile and distribution between the EMP and PK pathways in *L. reuteri* JCM 1112 in chemically defined medium with glucose as the sole carbon source.** Data are averages of the all the datasets used to constrain and validate the model, with error bars representing standard deviation. The percentage of PKP usage was defined as in Burgé et al., i.e. as the ethanol concentration divided by the sum of lactate and ethanol concentrations divided by 2.



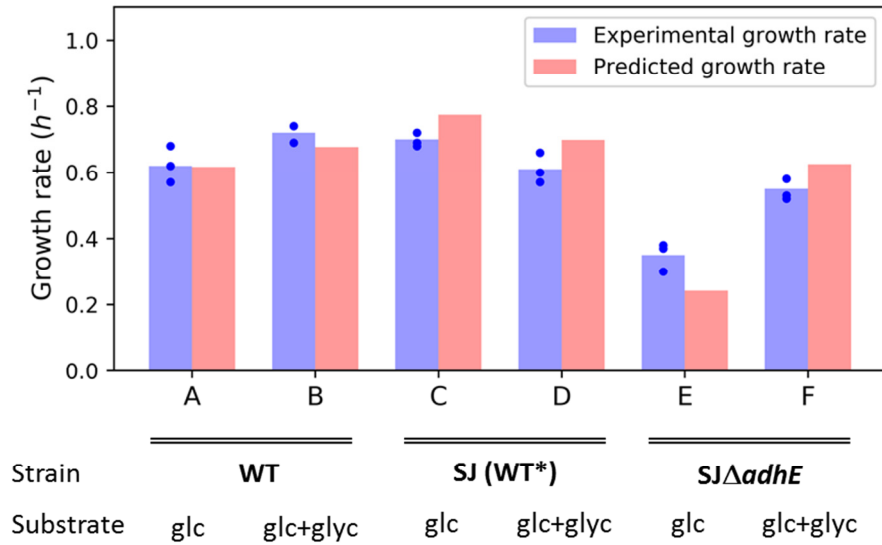

859  
860  
861  
862  
863  
864  
865

**Figure 3. Predicted and experimental growth rates.** Experimentally measured growth rates for each of the six data sets are shown in blue, with blue dots denoting individual replicates and blue bars representing average values. For each dataset, the model was constrained with average experimental values for uptake and secretion rates of carbon sources, byproducts and selected amino acids, and optimized for growth. Predicted growth rates are represented by red bars. Different datasets used are indicated with letters - abbreviations: glc: glucose; glyc: glycerol.

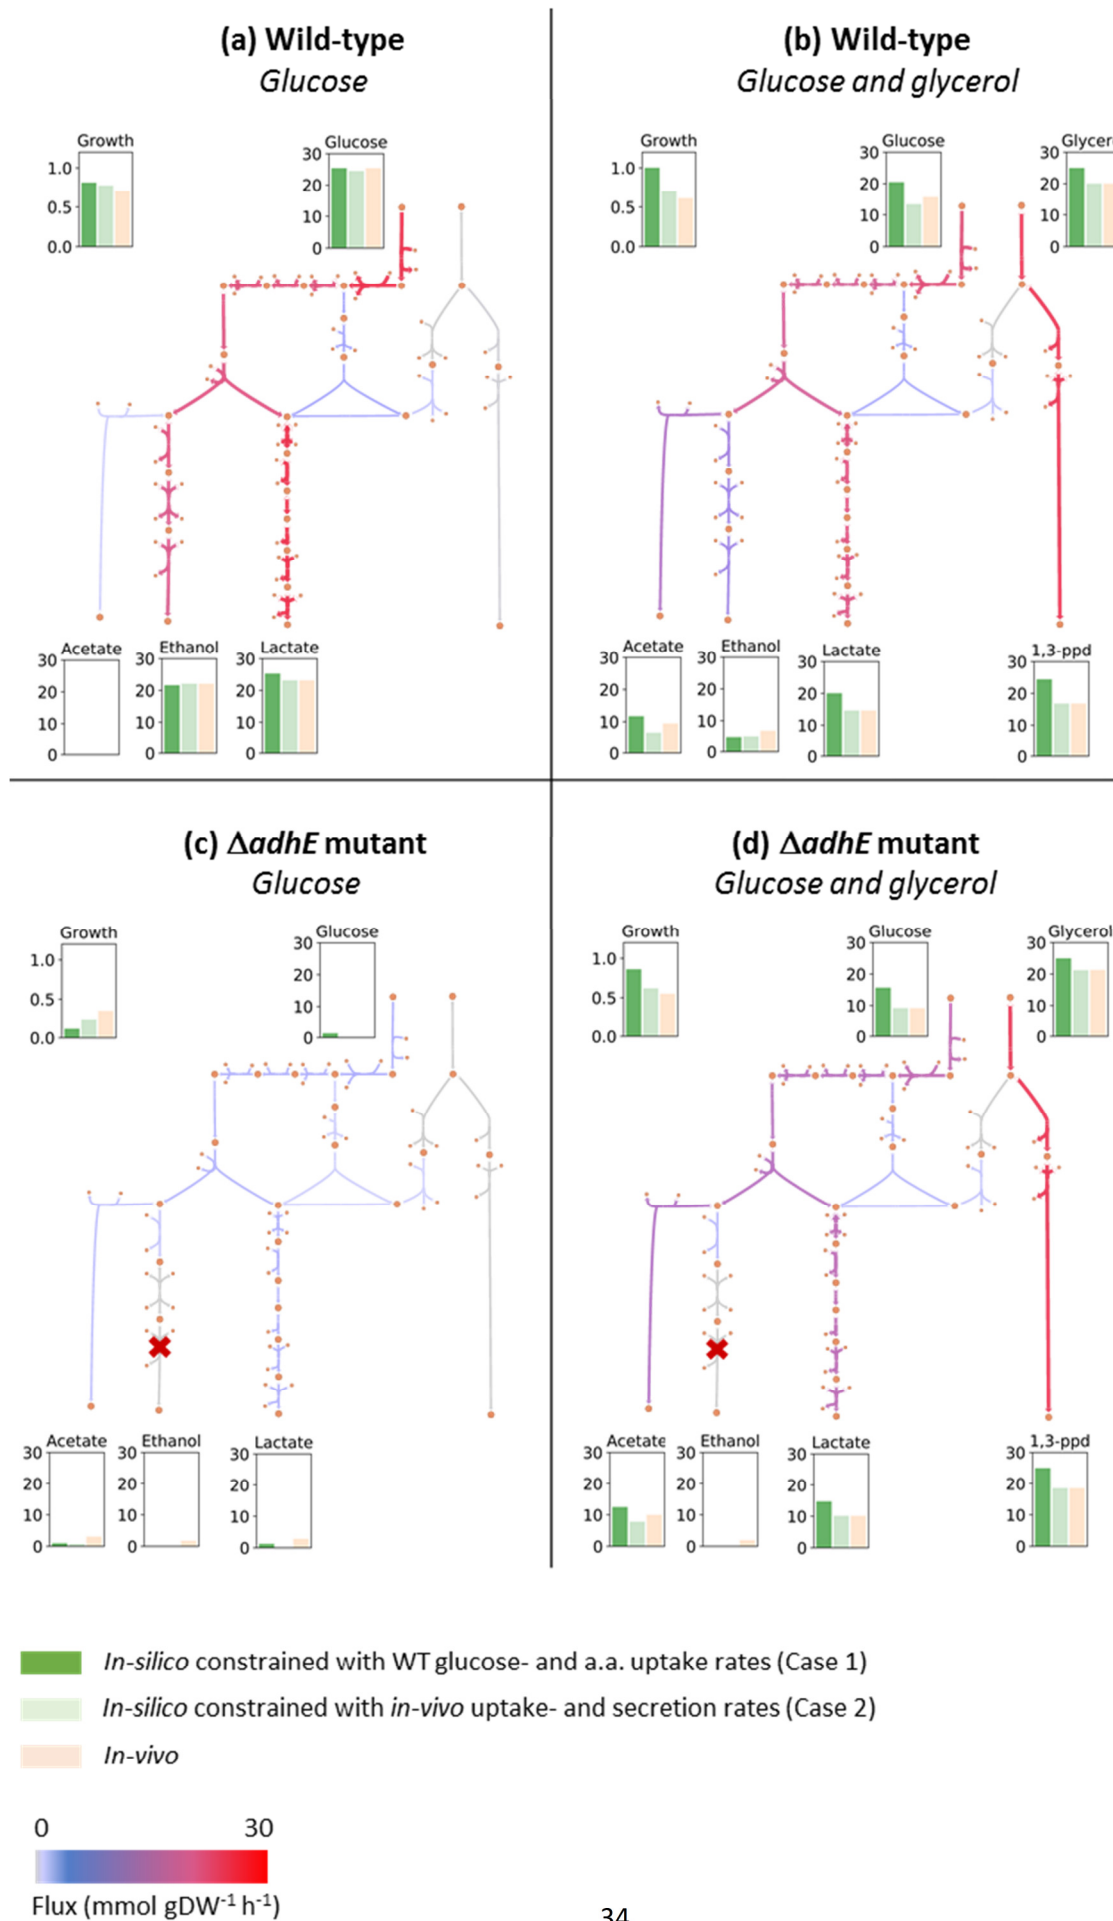

867 **Figure 4. Predicted and experimental fluxes of key metabolites in the wild-type strain (SJ) and the adhE**  
868 **mutant.** The wild-type strain was grown on glucose (a) and glucose and glycerol (b), and the adhE mutant was  
869 also grown on glucose (c) and glucose and glycerol (d). Bar plots show the average measured rates from 3  
870 replicates (light orange), predicted rates from model constrained with average experimental uptake rates of the  
871 WT grown on glucose, or case 1 (dark green), and predicted rates from model constrained with average  
872 experimental rates from the strain and condition under study, or case 2 (light green). Metabolic maps show  
873 predicted flux distributions for case 1. All units for uptake- and secretion rates are in  $\text{mmol gDW}^{-1} \text{h}^{-1}$  and for  
874 growth rates in  $\text{h}^{-1}$ .

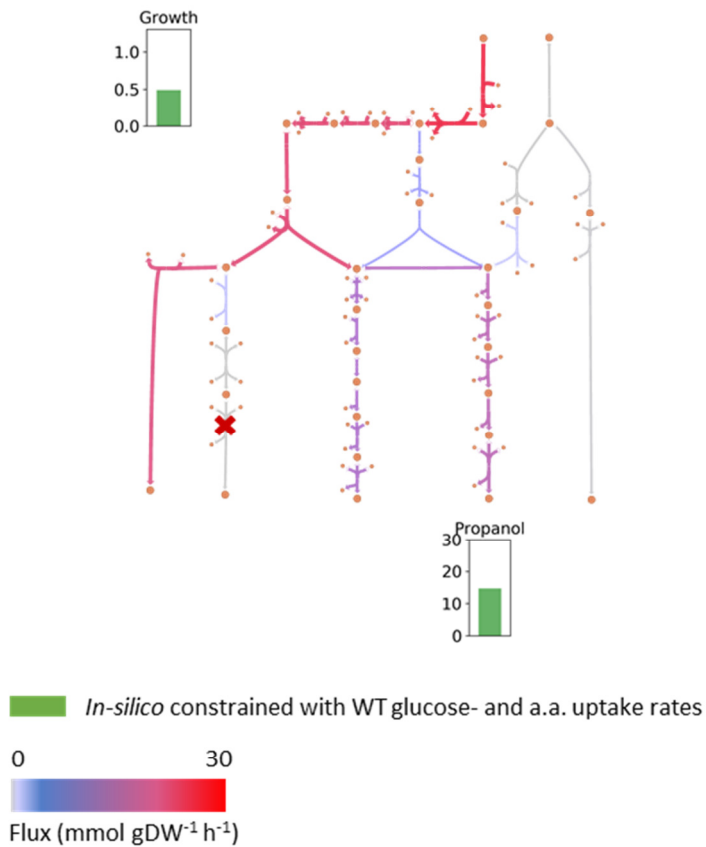

876 **Figure 5. Predicted flux distribution, growth rate and 1-propanol production of *adhE* mutant grown on**  
877 **glucose, with active 1,2-propanediol and 1-propanol pathways.** The model was constrained with average  
878 experimental uptake rates of the WT grown on glucose and optimized for growth. Units for propanol secretion  
879 rate is in  $\text{mmol gDW}^{-1} \text{h}^{-1}$  and growth rate in  $\text{h}^{-1}$ .
